# Supplementary material for: Fermentative α-Humulene Production from Homogenized Grass Clippings as a Growth Medium
Source: MDPI journal article supplement (doi:10.3390/molecules27248684), 2022-12-08
Supplement: s1 [file s1]

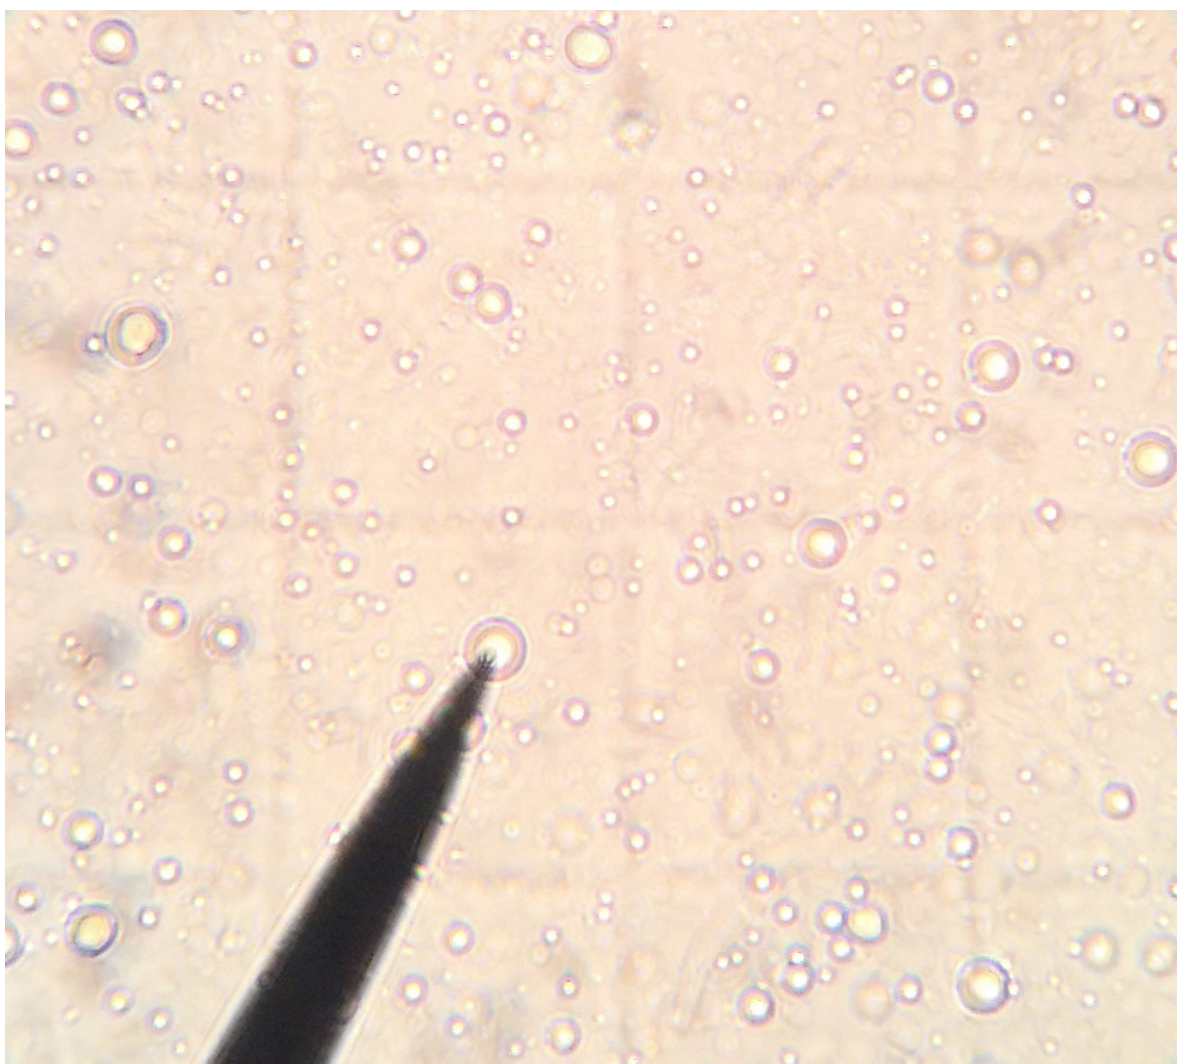

Figure S1: Microscopic image of a grass medium sample with dodecane after 48 h of cultivation (1000 $\times$  magnification; squares have a size of  $50 \times 50 \mu\text{m}$ ). The needle points to a vesicle of the oil-in-water emulsion of dodecane in the grass medium

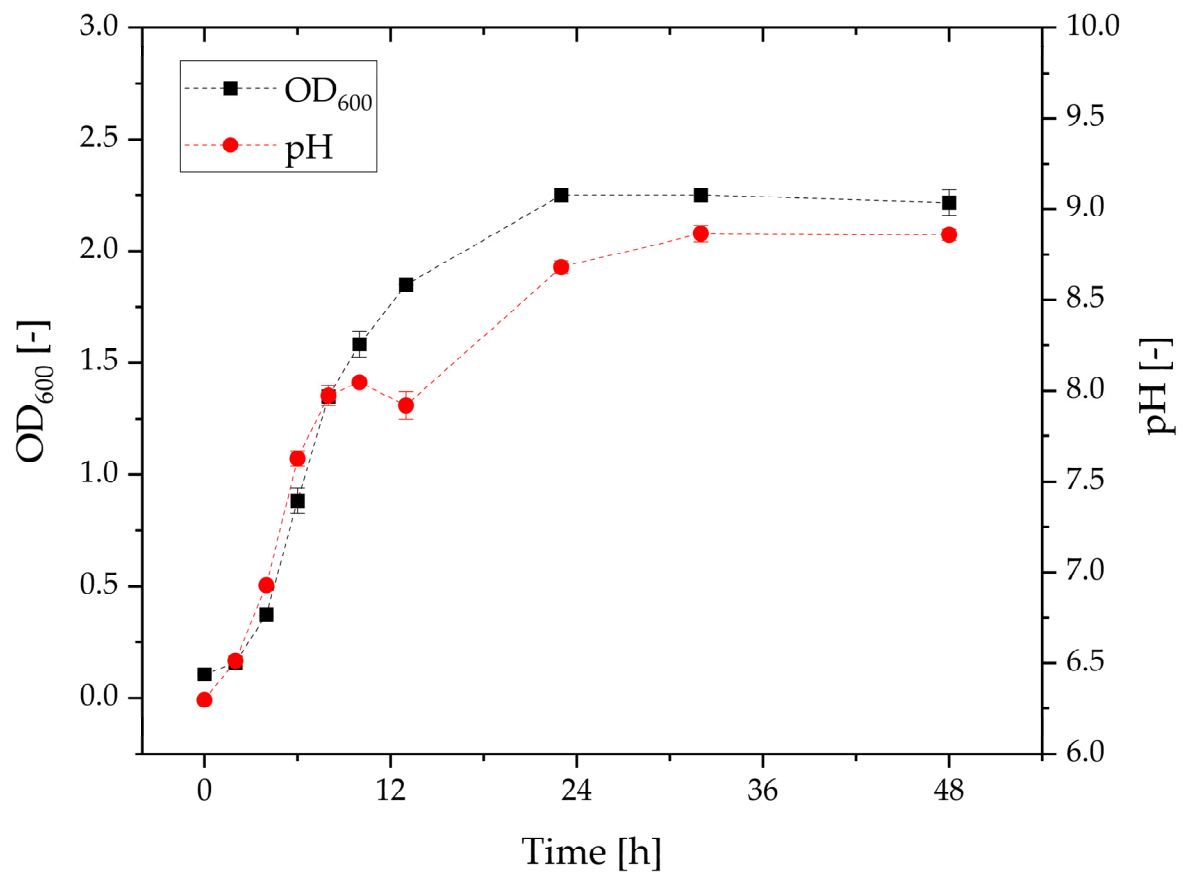

Figure S2: Growth curve and pH during the cultivation of *C. necator* pKR-hum in grass medium without the addition of dodecane ( $n = 3$ , dashed line serves as a guide to the eye).
